# Supplementary material
Source: Springer Nature journal article supplement (https://www.springermedizin.de/resource/supplementary/13054_2012_920_MOESM1_ESM.pdf/9709310)

**Figure 1. Patient flow**

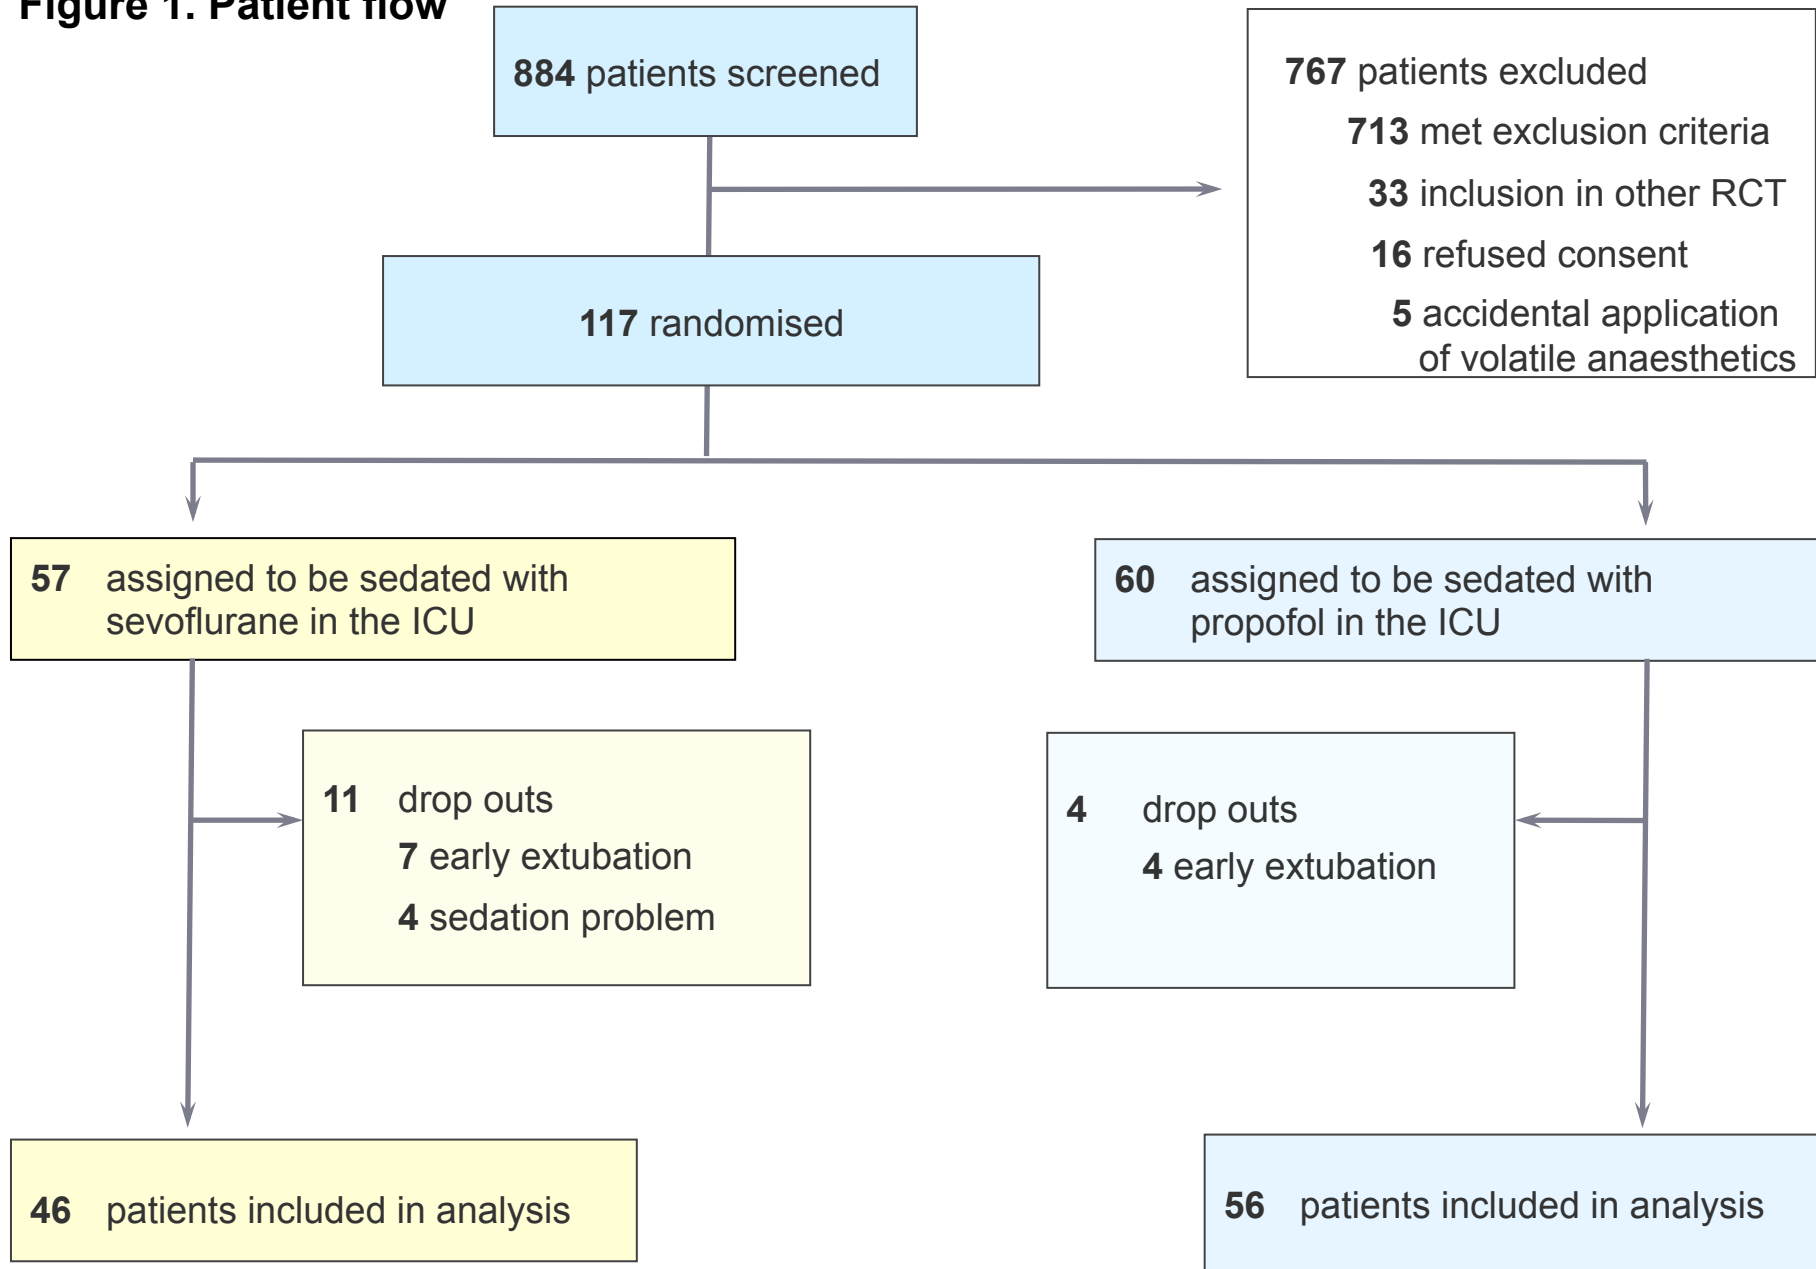

Supplement: MOESM1 [file 9709310]
